# Supplementary figures and images for: Pb2FeReO6: new defect pyrochlore oxide with a geometrically frustrated Fe/Re sublatticeElectronic supplementary information (ESI) available: powder XRD patterns of pyrochlores Pb2FeReO6.1 and Pb2FeReO5.81. See http://www.rsc.org/suppdata/jm/b3/b304118m/
Source: Royal Society of Chemistry journal article supplement (doi:10.1039/b304118m), 2003-01-01

**
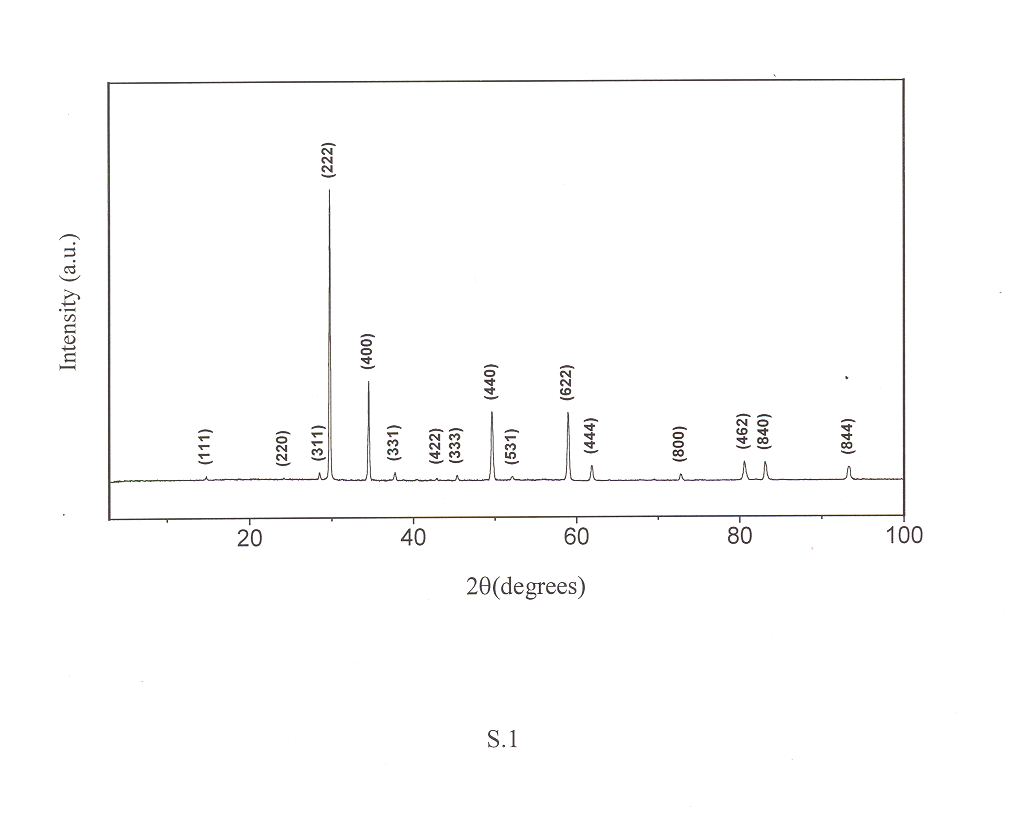
**

**S.1.** Powder XRD pattern of pyrochlore Pb2FeReO6.1.

**
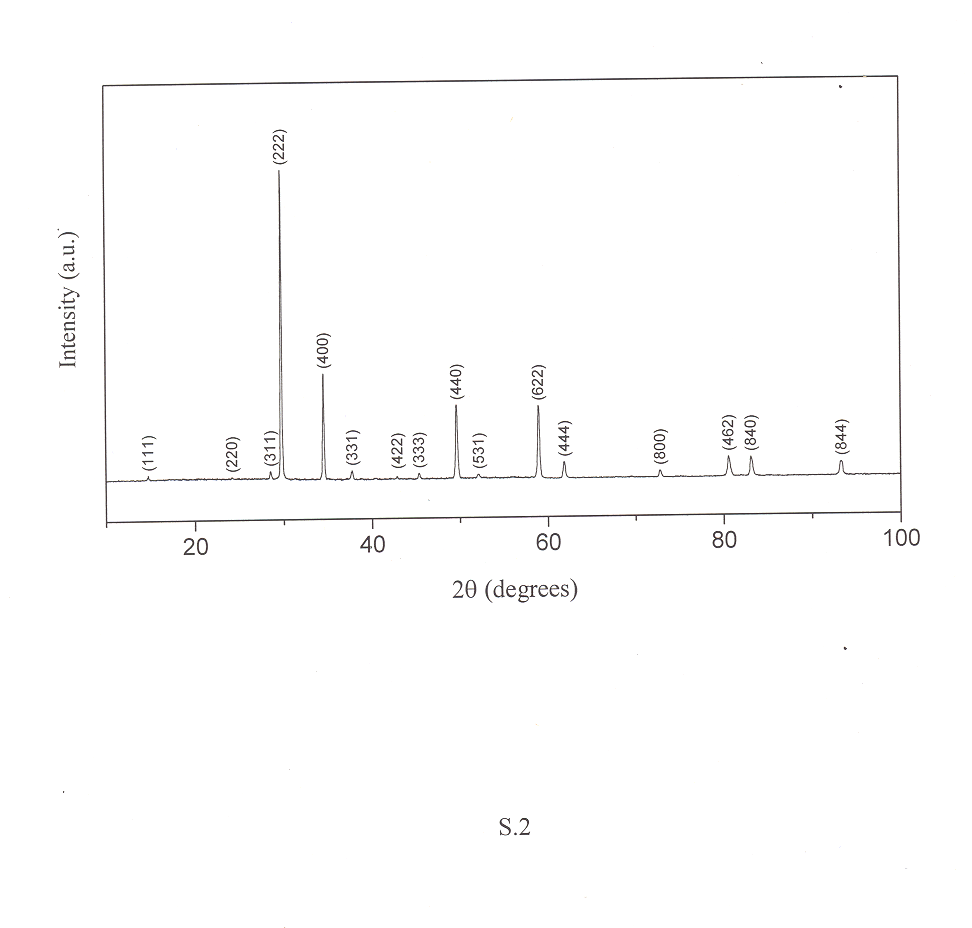
**

**S.2.** Powder XRD pattern of pyrochlore Pb2FeReO5.81.

Supplement: b304118m.doc [file b304118m.doc]
